# Supplementary material
Source: publisher site journal article supplement (https://study.sagepub.com/sites/default/files/appendix_2b.pdf)
Supplement: Supplementary file 1 [file appendix_2b.pdf]

## Appendix 2(b) Assessment of Auditory Discrimination

**Name:** \_\_\_\_\_ **Date of assessment:** \_\_\_\_\_  
**Date of birth:** \_\_\_\_\_ **Chronological age:** \_\_\_\_\_

### Auditory Discrimination

#### Instructions:

#### Note:

The learner should face away from you so that there are no visual clues. (It is usual to stand **behind** the learner when giving this test.) Care should be taken not to emphasise particular phonemes where there are differences.

Say, 'I'm going to say two words to you and I want you to tell me if you hear two different words like "house" and "mouse" or two words that are the same said twice like "pan" and "pan".'

#### Practice item:

Say, 'Are these words the same or are they different: "flap", "clap".'

(The learner can say, 'same or different' or 'yes' for same and 'no' for different.)

| Stimulus words | Learner's response |
|----------------|--------------------|
| rag / bag      |                    |
| gate / cake    |                    |
| sun / sun      |                    |
| tap / pat      |                    |
| nip / pin      |                    |
| kind / kind    |                    |
| sit / sit      |                    |
| mug / hug      |                    |
| chip / ship    |                    |
| tin / tan      |                    |
| no / no        |                    |
| step / stop    |                    |
| bog / dog      |                    |
| in / on        |                    |
| trip / trap    |                    |

**Scores:** Number correct **Same** /4  
Number correct **Different** /11  
Total correct /15

**Note any particular difficulties.**

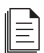

#### Photocopiable

*Assessment of Learners with Dyslexic-Type Difficulties 2e* © 2018 Sylvia Phillips and Kathleen Kelly (Sage: London).
